# Supplementary material for: Soil carbon accrual and biopore formation across a plant diversity gradient
Source: Copernicus journal article supplement (doi:10.5194/egusphere-2025-2584), 2025-06-25
Supplement: Supplementary file [file Supplementary Information.pdf › Revision_RC1/Supplementary Information.pdf]

# Soil carbon accrual and biopore formation across a plant diversity gradient

Kyungmin Kim<sup>1,2,3,4</sup>, Maik Geers-Lucas<sup>5</sup>, G. Philip Robertson<sup>3,4,6</sup> and Alexandra Kravchenko<sup>3,4</sup>

<sup>1</sup>Department of Agricultural Biotechnology, Seoul National University, Seoul, Korea

<sup>2</sup>Institute of Plant Environmental Science, Research Institute of Agriculture and Life Sciences, Seoul National University, Seoul, Korea

<sup>3</sup>Department of Plant Soil and Microbial Sciences, Michigan State University, East Lansing, MI, USA

<sup>4</sup>DOE Great Lakes Bioenergy Research Center, Michigan State University, East Lansing, MI, USA

<sup>5</sup>Department of Soil Science, Technische Universität Berlin, Germany

<sup>6</sup>W.K. Kellogg Biological Station, Michigan State University, Hickory Corners, MI, USA

*Correspondence to:* Kyungmin Kim (km\_kim@snu.ac.kr)

Supplementary Information

**Table S1. Plant species and diversity information in the studied diversity systems**

| Treatment                  | CE1              | CE7                                               | CE8                                                                                                   | CE9                                                                                                                                                                                                                                                                                                                                     | CE10                                                                                                                                                                                                                                                                                                                                                                                                                                                                                                                                                                                                                                                                                                                                                                                                                                                                                                                                                                                                                                                                                                                                                                                                                 | CE12                                                                                                                                                                                                                                                                                                                                                                                                                                                                                                                                                                                                                                                                                                                                                                                                                                                                                                                                                                                                                                                                                                                                                                                                                 |
|----------------------------|------------------|---------------------------------------------------|-------------------------------------------------------------------------------------------------------|-----------------------------------------------------------------------------------------------------------------------------------------------------------------------------------------------------------------------------------------------------------------------------------------------------------------------------------------|----------------------------------------------------------------------------------------------------------------------------------------------------------------------------------------------------------------------------------------------------------------------------------------------------------------------------------------------------------------------------------------------------------------------------------------------------------------------------------------------------------------------------------------------------------------------------------------------------------------------------------------------------------------------------------------------------------------------------------------------------------------------------------------------------------------------------------------------------------------------------------------------------------------------------------------------------------------------------------------------------------------------------------------------------------------------------------------------------------------------------------------------------------------------------------------------------------------------|----------------------------------------------------------------------------------------------------------------------------------------------------------------------------------------------------------------------------------------------------------------------------------------------------------------------------------------------------------------------------------------------------------------------------------------------------------------------------------------------------------------------------------------------------------------------------------------------------------------------------------------------------------------------------------------------------------------------------------------------------------------------------------------------------------------------------------------------------------------------------------------------------------------------------------------------------------------------------------------------------------------------------------------------------------------------------------------------------------------------------------------------------------------------------------------------------------------------|
| Plant species              | -<br>(Bare soil) | Switchgrass<br>( <i>Panicum virgatum</i> ),<br>C4 | Switchgrass<br>( <i>Panicum virgatum</i> ), C4<br>Canada wild rye<br>( <i>Elymus canadensis</i> ), C3 | Switchgrass<br>( <i>Panicum virgatum</i> ), C4<br>Big bluestem<br>( <i>Andropogon gerardii</i> ), C4<br>Little bluestem<br>( <i>Schizachyrium scoparium</i> ), C4<br>Indian grass<br>( <i>Sorghastrum nutans</i> ), C4<br>Canada wild rye<br>( <i>Elymus canadensis</i> ), C3<br>Prairie June grass<br>( <i>Koeleria cristata</i> ), C3 | Switchgrass ( <i>Panicum virgatum</i> ), C4<br>Big bluestem ( <i>Andropogon gerardii</i> ), C4<br>Little bluestem ( <i>Schizachyrium scoparium</i> ), C4<br>Indian grass ( <i>Sorghastrum nutans</i> ), C4<br>Canada wild rye ( <i>Elymus canadensis</i> ), C3<br>Prairie June grass ( <i>Koeleria cristata</i> ), C3<br><i>Desmodium canadense</i> , forb<br><i>Rudbeckia hirta</i> L., forb<br><i>Monarda Firstulosa</i> , forb<br><i>Solidago rigida</i> , forb<br><i>Lespedeza capitata</i> , forb<br><i>Baptisia leucanta</i> , forb<br><i>Amorpha canescens</i> , forb<br><i>Desmodium illinoense</i> , forb<br><i>Dalea purpureum</i> , forb<br><i>Anemone canadensis</i> L., forb<br><i>Asclepias tuberosa</i> L., forb<br><i>Euphorbia corollata</i> L., forb<br><i>Tradescantia ohiensis</i> , forb<br><i>Zizia aurea</i> , forb<br><i>Silphium perfoliatum</i> L., forb<br><i>Ratibida pinnata</i> , forb<br><i>Coreopsis tripteris</i> L., forb<br><i>Asclepias syriaca</i> L., forb<br><i>Oenothera biennis</i> L., forb<br><i>Solidago speciosa</i> L., forb<br><i>Aster novae-angliae</i> L., forb<br><i>Aster pilosus</i> , forb<br><i>Solidago nemoralis</i> , forb<br><i>Aster laevis</i> L., forb | Switchgrass ( <i>Panicum virgatum</i> ), C4<br>Big bluestem ( <i>Andropogon gerardii</i> ), C4<br>Little bluestem ( <i>Schizachyrium scoparium</i> ), C4<br>Indian grass ( <i>Sorghastrum nutans</i> ), C4<br>Canada wild rye ( <i>Elymus canadensis</i> ), C3<br>Prairie June grass ( <i>Koeleria cristata</i> ), C3<br><i>Desmodium canadense</i> , forb<br><i>Rudbeckia hirta</i> L., forb<br><i>Monarda Firstulosa</i> , forb<br><i>Solidago rigida</i> , forb<br><i>Lespedeza capitata</i> , forb<br><i>Baptisia leucanta</i> , forb<br><i>Amorpha canescens</i> , forb<br><i>Desmodium illinoense</i> , forb<br><i>Dalea purpureum</i> , forb<br><i>Anemone canadensis</i> L., forb<br><i>Asclepias tuberosa</i> L., forb<br><i>Euphorbia corollata</i> L., forb<br><i>Tradescantia ohiensis</i> , forb<br><i>Zizia aurea</i> , forb<br><i>Silphium perfoliatum</i> L., forb<br><i>Ratibida pinnata</i> , forb<br><i>Coreopsis tripteris</i> L., forb<br><i>Asclepias syriaca</i> L., forb<br><i>Oenothera biennis</i> L., forb<br><i>Solidago speciosa</i> L., forb<br><i>Aster novae-angliae</i> L., forb<br><i>Aster pilosus</i> , forb<br><i>Solidago nemoralis</i> , forb<br><i>Aster laevis</i> L., forb |
| Plant species diversity    | 0                | 1                                                 | 2                                                                                                     | 6                                                                                                                                                                                                                                                                                                                                       | 10                                                                                                                                                                                                                                                                                                                                                                                                                                                                                                                                                                                                                                                                                                                                                                                                                                                                                                                                                                                                                                                                                                                                                                                                                   | 30                                                                                                                                                                                                                                                                                                                                                                                                                                                                                                                                                                                                                                                                                                                                                                                                                                                                                                                                                                                                                                                                                                                                                                                                                   |
| Plant functional Diversity | 0                | 1                                                 | 2                                                                                                     | 2                                                                                                                                                                                                                                                                                                                                       | 3                                                                                                                                                                                                                                                                                                                                                                                                                                                                                                                                                                                                                                                                                                                                                                                                                                                                                                                                                                                                                                                                                                                                                                                                                    | 3                                                                                                                                                                                                                                                                                                                                                                                                                                                                                                                                                                                                                                                                                                                                                                                                                                                                                                                                                                                                                                                                                                                                                                                                                    |

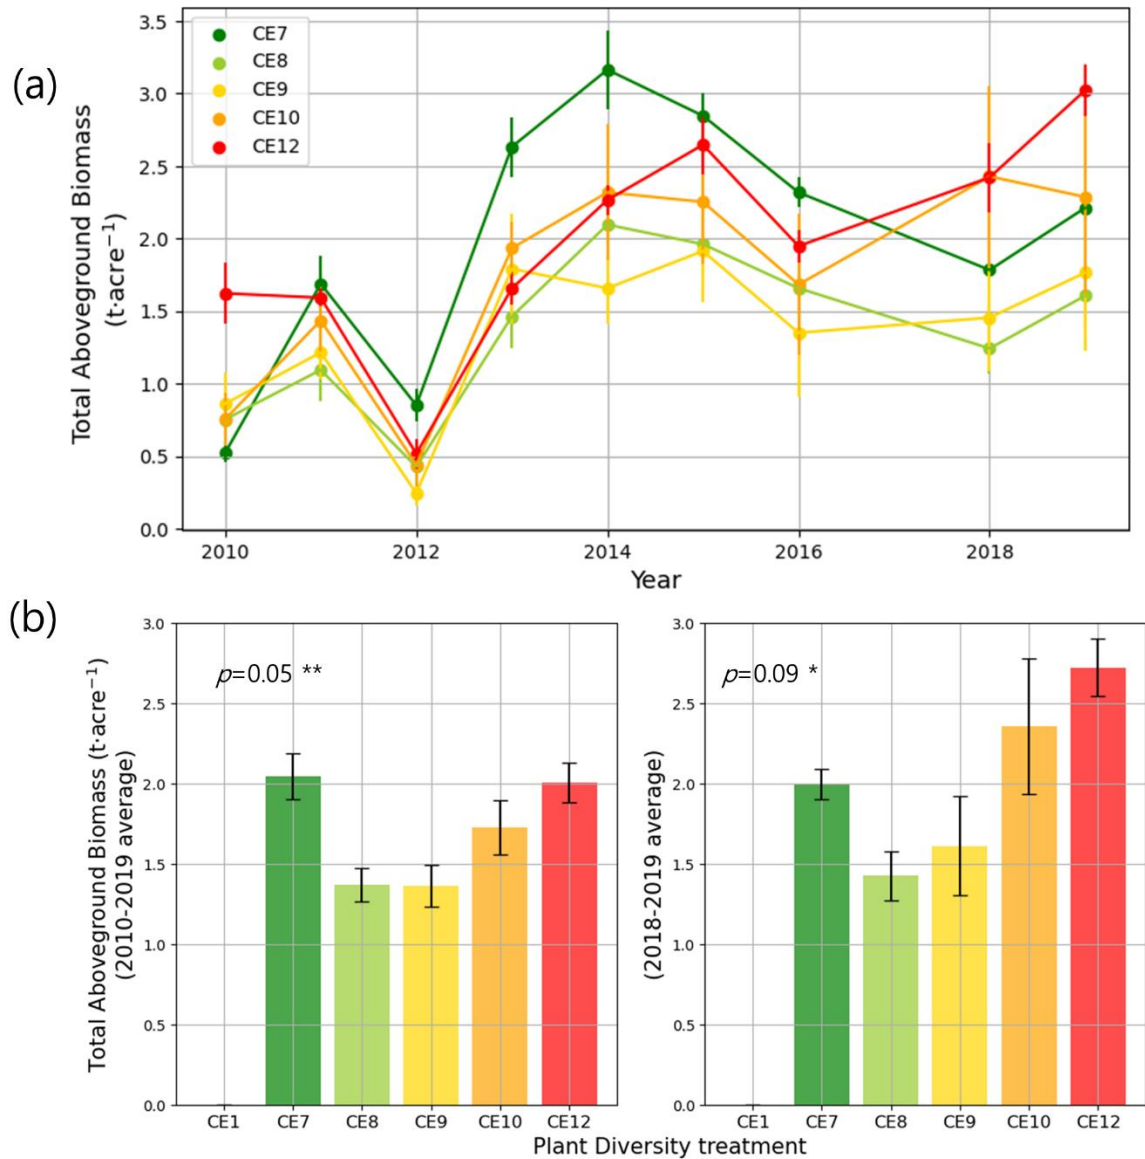

**Figure S1:** Total aboveground biomass during the entire study period (a), and the average total aboveground biomass (b) during the same period (2010-2019) (left) and from 2018 to 2019 (right). Asterisks \* and \*\* indicate statistically significant differences among plant diversity treatments at  $p < 0.10$  and  $0.05$ , respectively. Letters indicate significant differences between plant diversity treatments ( $p < 0.05$ ).

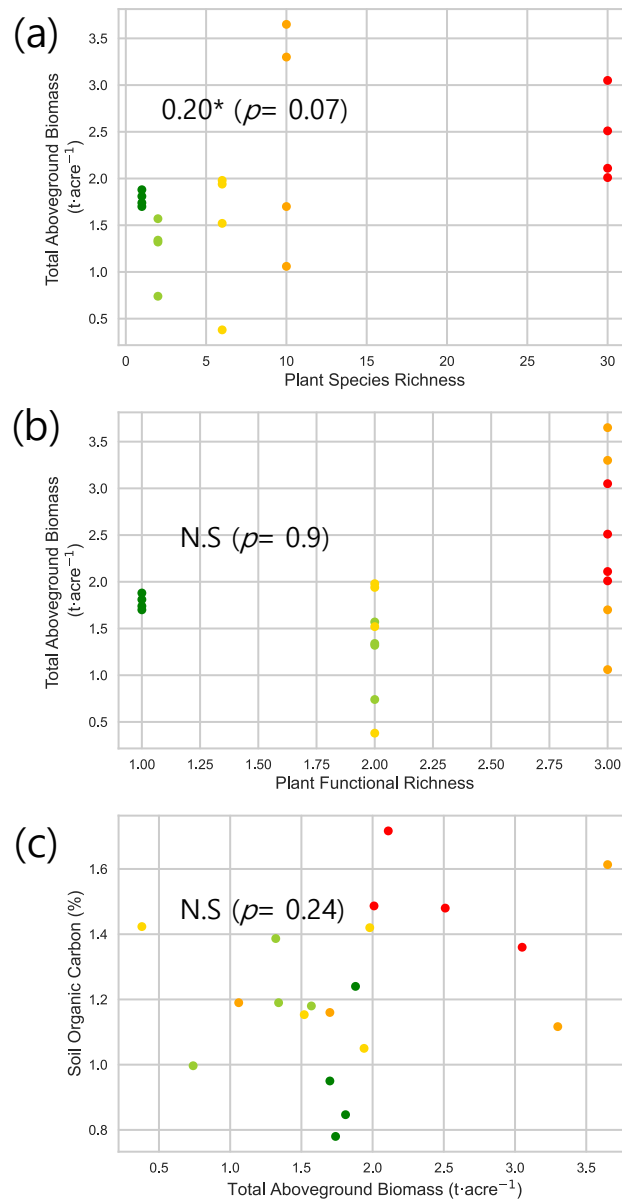

**Figure S2:** Correlation between plant species richness and total aboveground biomass in 2018 8/18/2025(a), plant functional richness and total aboveground biomass (b), and between total aboveground biomass and soil organic carbon (c). When  $p < 0.10$ ,  $R^2$  values are provided. Asterisk \* indicates statistically significant regression models at  $p < 0.10$ , and N.S. indicates no significant regression.

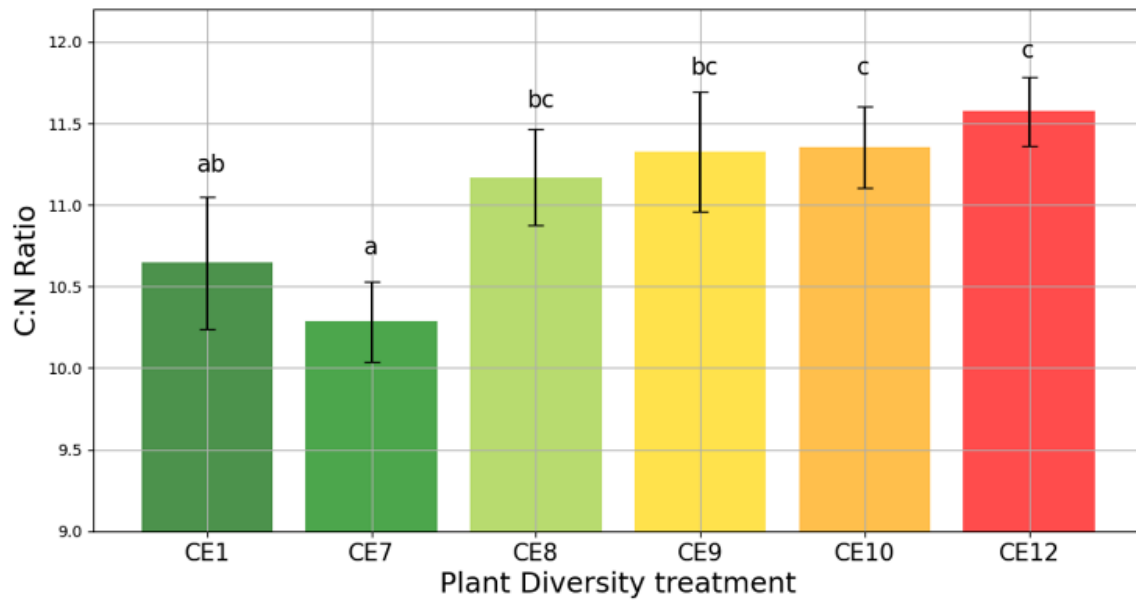

**Figure S3:** Carbon to Nitrogen ratio (C:N) of the soil in different plant diversity systems. Letters indicate significant differences between plant diversity treatments ( $p < 0.05$ ).

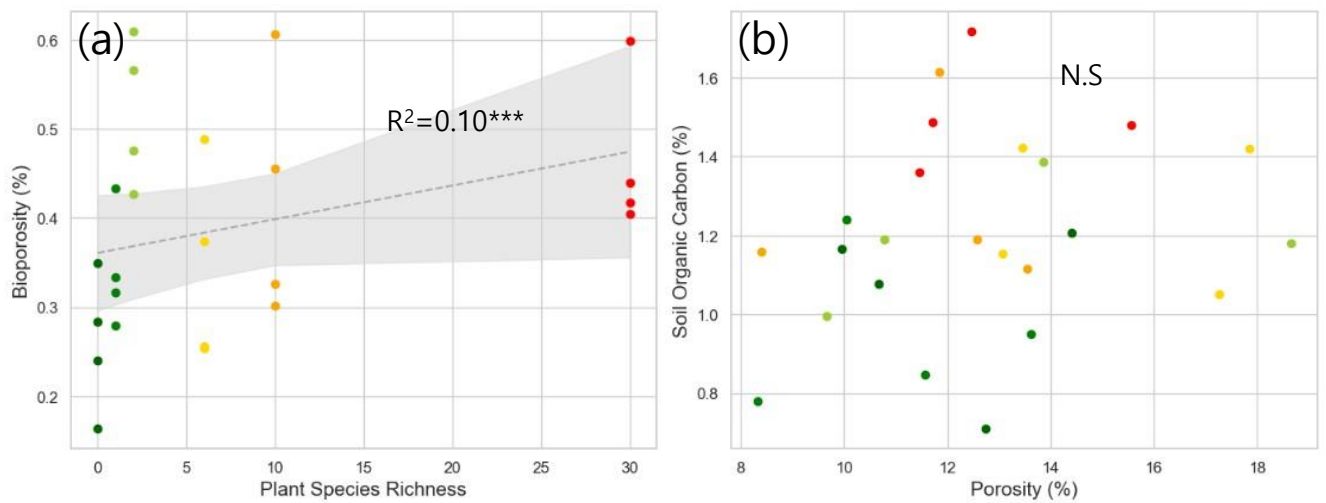

**Figure S4:** Correlation between plant species richness and bioporosity (a), and between porosity and soil organic carbon (b).  $R^2$  values are provided for each model. Dotted gray lines represent fitted regression models, with light gray shaded area denoting 95% confidence interval. Asterisks \*\*\* indicate statistically significant regression models at  $p < 0.01$ , and N.S indicates no significant regression.
